# Supplementary material for: Nanopore Metagenomic Sequencing for Detection and Characterization of SARS-CoV-2 in Clinical Samples
Source: bioRxiv or medRxiv preprint supplement (doi:10.1101/2021.08.13.21261922), 2021-08-23
Supplement: Supplementary file [file media-1.pdf]

## Supplementary Material

**Supplementary Table 1: A.** Primers and **B.** probes for RT-PCR testing performed at the BCCDC Public Health Laboratory and VGH

| A. Primer Name    | Sequence (5' → 3')         | Target                                            | Design           |
|-------------------|----------------------------|---------------------------------------------------|------------------|
| <b>BCCDC RdRP</b> |                            |                                                   |                  |
| BCCDC RdRP Fwd    | TGCCGATAAGTATGTCCGCA       | RNA-dependent RNA polymerase, SARS-CoV-2 specific | Tracy Lee, BCCDC |
| BCCDC RdRP Rev    | CAGCATCGTCAGAGAGTATCATCATT |                                                   |                  |
| <b>E-gene</b>     |                            |                                                   |                  |
| E-gene_Fwd        | ACAGGTACGTTAATAGTTAATAGCGT | Envelope protein, all SARS related viruses        | Tracy Lee, BCCDC |
| E-gene_Rev        | ATATTGCAGCAGTACGCACACA     |                                                   |                  |
| <b>RNAseP</b>     |                            |                                                   |                  |
| RNAseP F          | AGATTTGGACCTGCGAGCG        | Human ribonuclease P                              | Tracy Lee, BCCDC |
| RNAseP R          | GAGCGGCTGTCTCAACAAGT       |                                                   |                  |

| B. Probe Names   | Sequence (5' → 3')                                                   |
|------------------|----------------------------------------------------------------------|
| <b>RdRP gene</b> |                                                                      |
| BCCDC RdRP probe | <b>FAM</b> /TTGACACAGACTTTGTGAATG/ <b>MGBNFQ</b>                     |
| <b>E-gene</b>    |                                                                      |
| E-gene _probe    | <b>Cy5</b> /ACACTAGCC/ <b>TAO</b> /ATCCTTACTGCGCTTCG/ <b>IAbRQSp</b> |
| <b>RNAseP</b>    |                                                                      |
| RNAseP probe     | <b>NED</b> /TCTGACCTGAAGGCTC/ <b>MGBNFQ</b>                          |

Mixed bases: **Y** = C or T, **K** = G or T, **R** = A or G

**Supplementary Table 2: A. Primers, B. probes, and C. reaction conditions for Variant of Concern PCR testing**

| <b>A. Primers</b>  |               |                                |                  |
|--------------------|---------------|--------------------------------|------------------|
| <b>Primer name</b> | <b>target</b> | <b>Sequence 5'-3'</b>          | <b>Design</b>    |
| N501Y_E484K-F1     | E484K         | AGAGAGATATTTCAACTGAAATCTATCAGG | Tracy Lee, BCCDC |
| N501Y-R3           | E484K & N501Y | CCACAAACAGTTGCTGGTGC           | Tracy Lee, BCCDC |
| N501Y-F2           | N501Y         | AATTGTTACTTTCTTTACAATCATATGG   | Tracy Lee, BCCDC |
| WT_N501Y_block     | N501Y         | CCAAC+C+CA+C+T+A+A/3InvdT/     | Tracy Lee, BCCDC |
| E_Sarbeco_F1       | E-gene        | ACAGGTACGTTAATAGTTAATAGCGT     | Corman et al.    |
| E_Sarbeco_R2       | E gene        | ATATTGCAGCAGTACGCACACA         | Corman et al.    |

| <b>B. Probes</b> |                  |                            |               |
|------------------|------------------|----------------------------|---------------|
| <b>Target</b>    | <b>Probe Dye</b> | <b>Sequence 5'-3'</b>      | <b>Design</b> |
| E484K_MGB-P1 VIC | VIC-MGB          | CTTGTAATGGTGTTAAAGGT       | Tracy Lee     |
| N501Y-P_FAM MGB  | FAM-MGB          | CCAACCCACTTATGG            | Tracy Lee     |
| E_Sarbeco_probe  | CY5-TAO          | ACACTAGCCATCCTTACTGCGCTTCG | Corman et al. |

**C. Thermocycling program**

| <b>Step</b>       | <b>Cycles</b> | <b>Temperature</b> | <b>Time</b> |
|-------------------|---------------|--------------------|-------------|
| RT                | 1             | 50°C               | 5 minutes   |
| Enzyme Activation | 1             | 95°C               | 20 seconds  |
| Amplification     | 40            | 95°C               | 3 seconds   |
|                   |               | 60°C               | 30 seconds  |

**Supplementary Table 3:** Detection of potential pathogens in study samples.

| <b>Study ID</b> | <b>Bacterial Reads</b> | <b>Co-infection (% total bacterial/viral reads)</b>                              |
|-----------------|------------------------|----------------------------------------------------------------------------------|
| P1              | 9,553                  | <i>Moraxella Catarrhalis</i> (7.4%)                                              |
| P2              | 64,987                 | <i>Haemophilus influenzae</i> (2.8%)                                             |
| P4              | 24,479                 | <i>Haemophilus parainfluenzae</i> (16.8%), <i>Neisseria meningitidis</i> (9.6%)  |
| P7              | 3,896                  | <i>Haemophilus influenzae</i> (14.7%), <i>Haemophilus parainfluenzae</i> (6.9%)  |
| P8              | 171,862                | <i>Haemophilus parainfluenzae</i> (1.6%)                                         |
| P9              | 3,132,744              | <i>Haemophilus parainfluenzae</i> (1.1%)                                         |
| P13             | 619,910                | <i>Haemophilus parainfluenzae</i> (4.5%), <i>Streptococcus pneumoniae</i> (2.7%) |
| P14             | 481,963                | <i>Moraxella catarrhalis</i> (31.6%)                                             |
| P17             | 307,454                | <i>Haemophilus parainfluenzae</i> (3.5%)                                         |
| P22             | 2,121                  | <i>Neisseria meningitidis</i> (4.6%), <i>Klebsiella pneumoniae</i> (1.1%)        |
| P27             | 2,862                  | <i>Klebsiella pneumoniae</i> (69.3%)                                             |
| P36             | 829                    | <i>Staphylococcus aureus</i> (9.5%)                                              |
| P38             | 7,376                  | <i>Staphylococcus aureus</i> (10.1%)                                             |
| N1              | 1,192                  | <i>Staphylococcus aureus</i> (54.4%)                                             |
| N5              | 55,465                 | <i>Streptococcus pneumoniae</i> (59.5%)                                          |

Only pathogens with greater than 1% relative abundance in samples with at least 1000 bacterial reads were included.

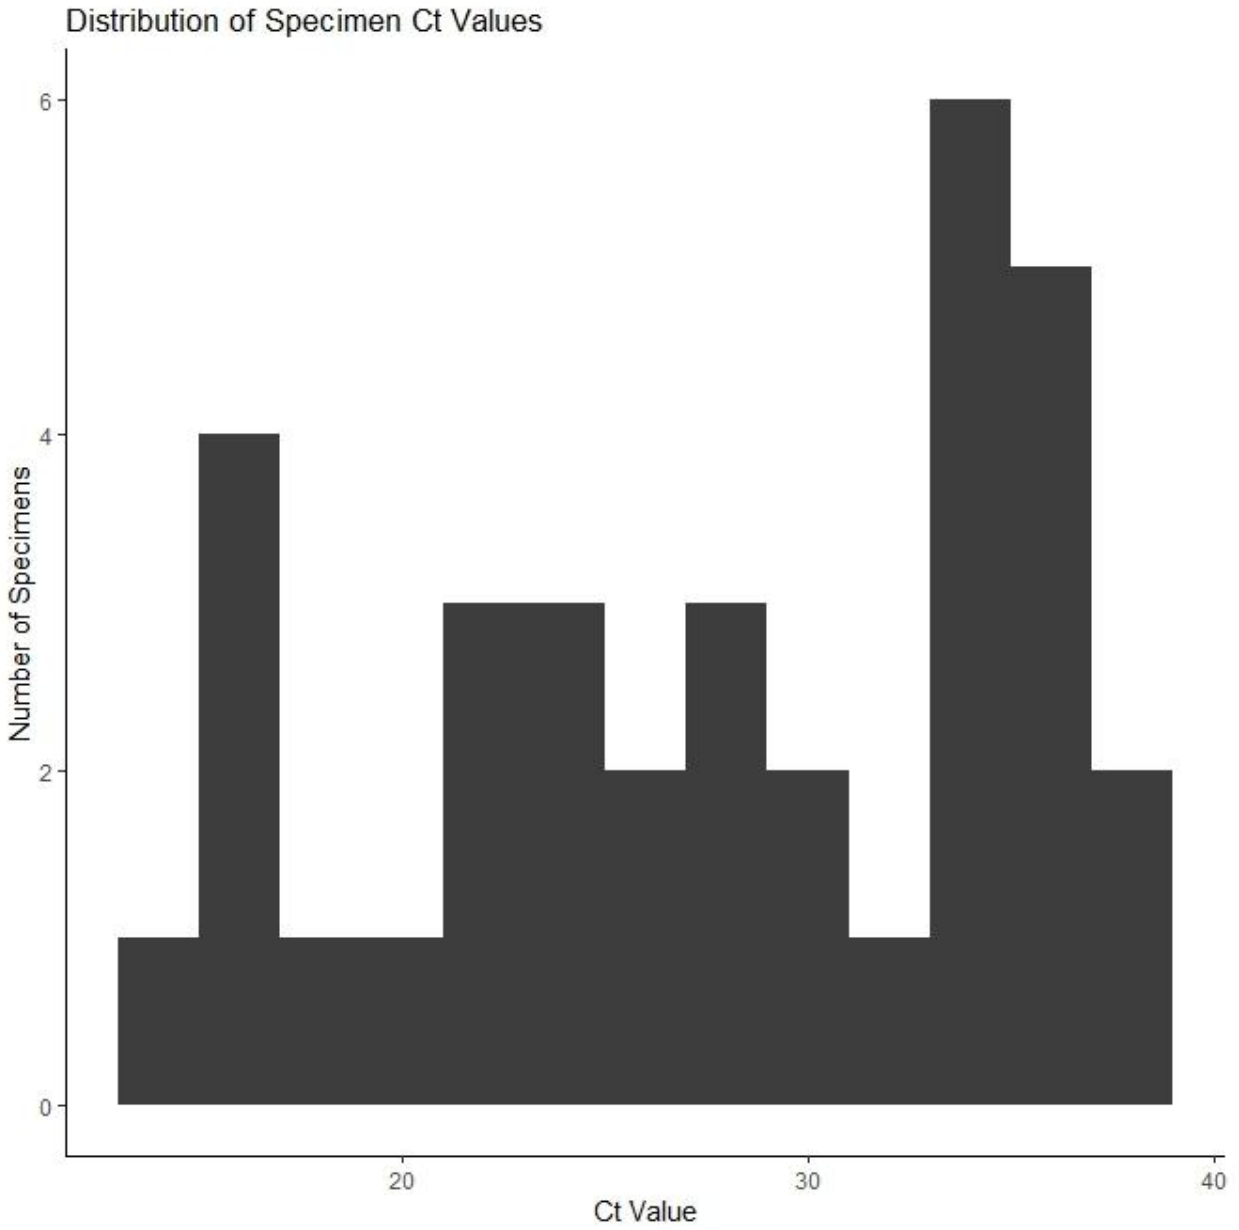

**Supplementary Figure 1:** Distribution of SARS-CoV-2 RT-qPCR positive study samples across  $C_t$  values

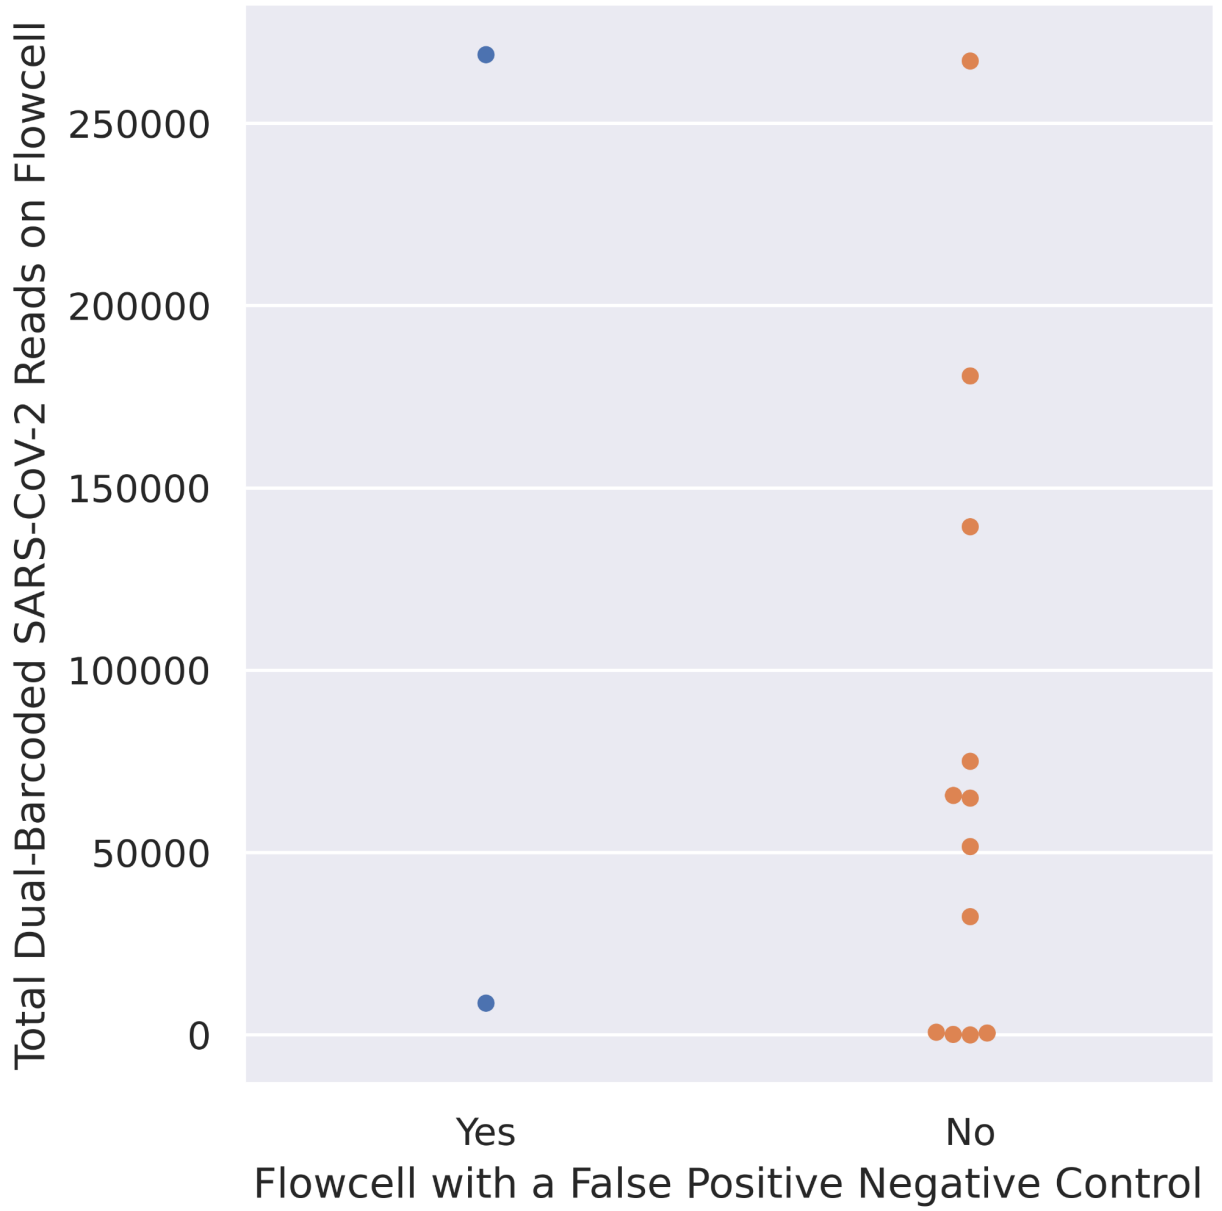

**Supplementary Figure 2:** Comparison of the total number of SARS-CoV-2 reads across all samples on a flowcell, stratified by flowcells with and without a false-positive negative control.

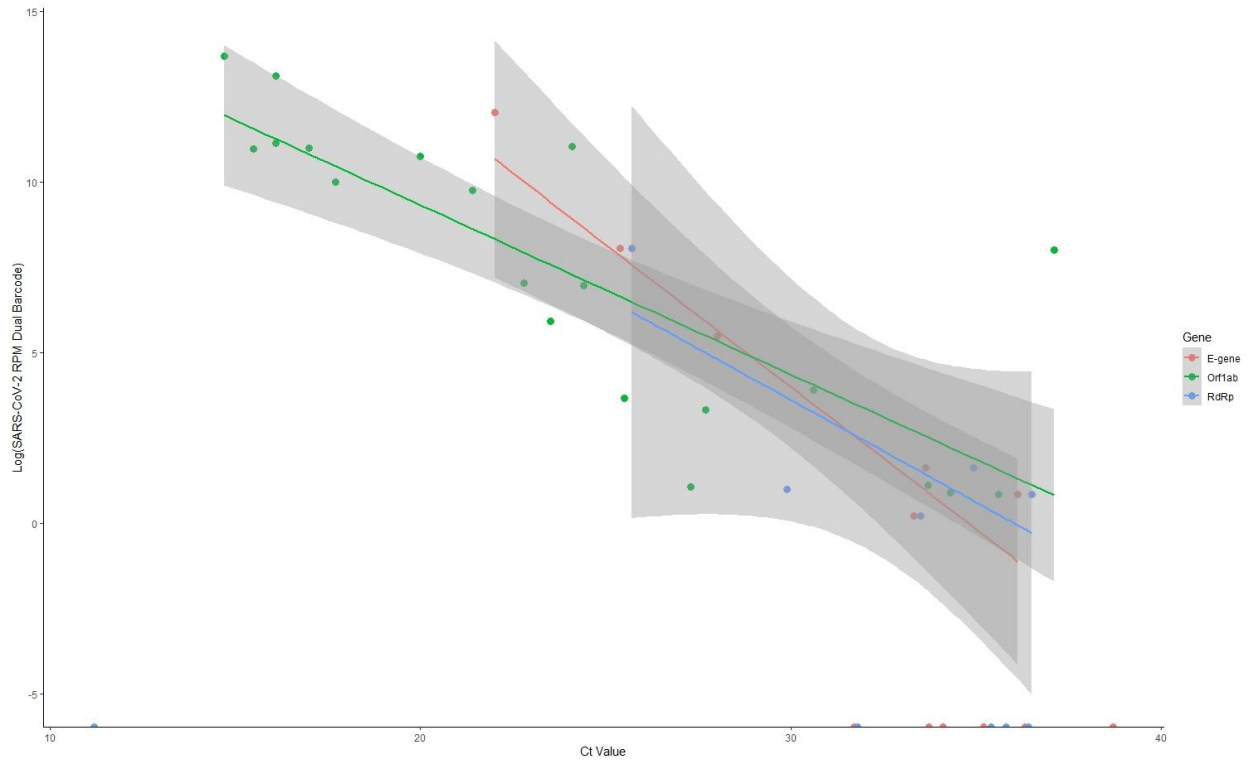

**Supplementary Figure 3:** Scatterplot of Log(SARS-CoV-2 RPM) against  $C_t$  value stratified by E-gene, ORF1ab, or RdRp.

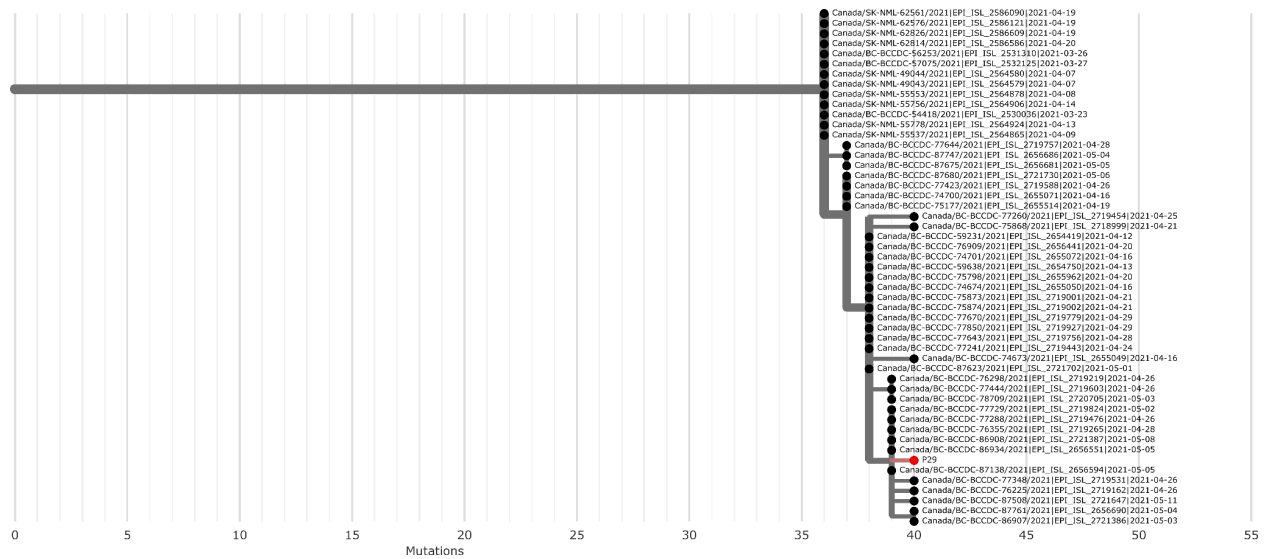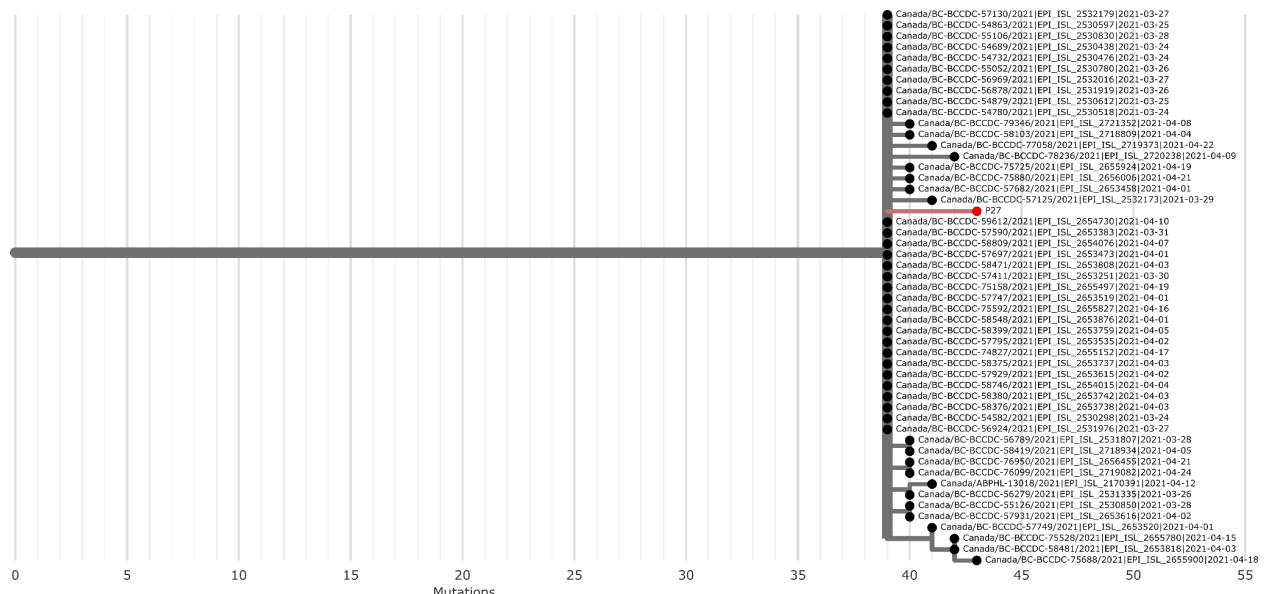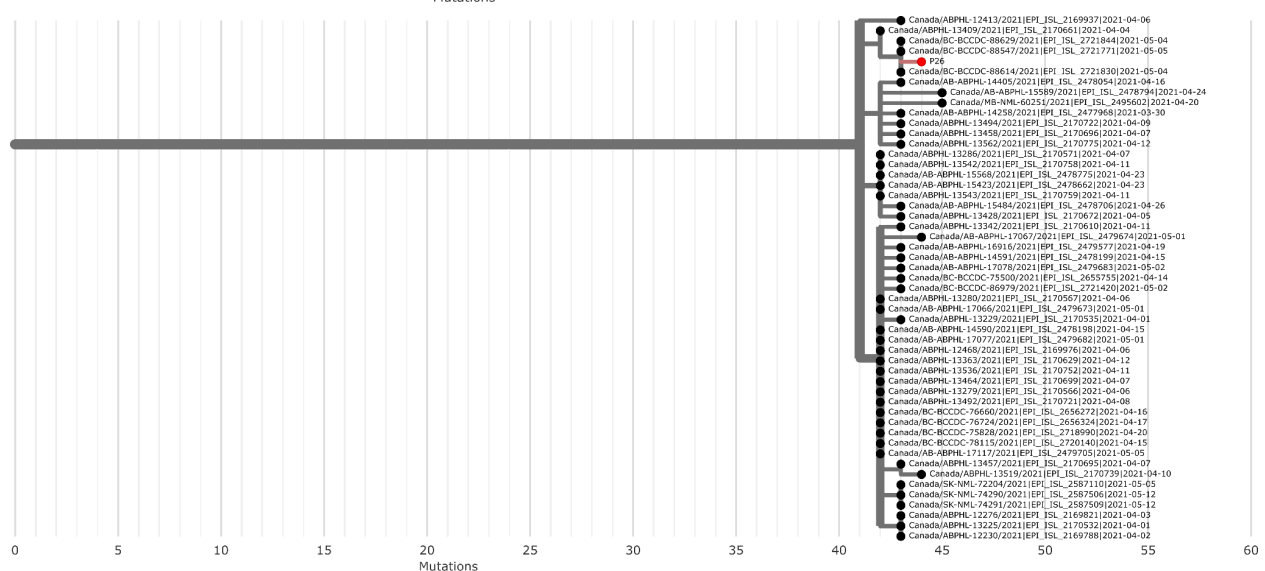

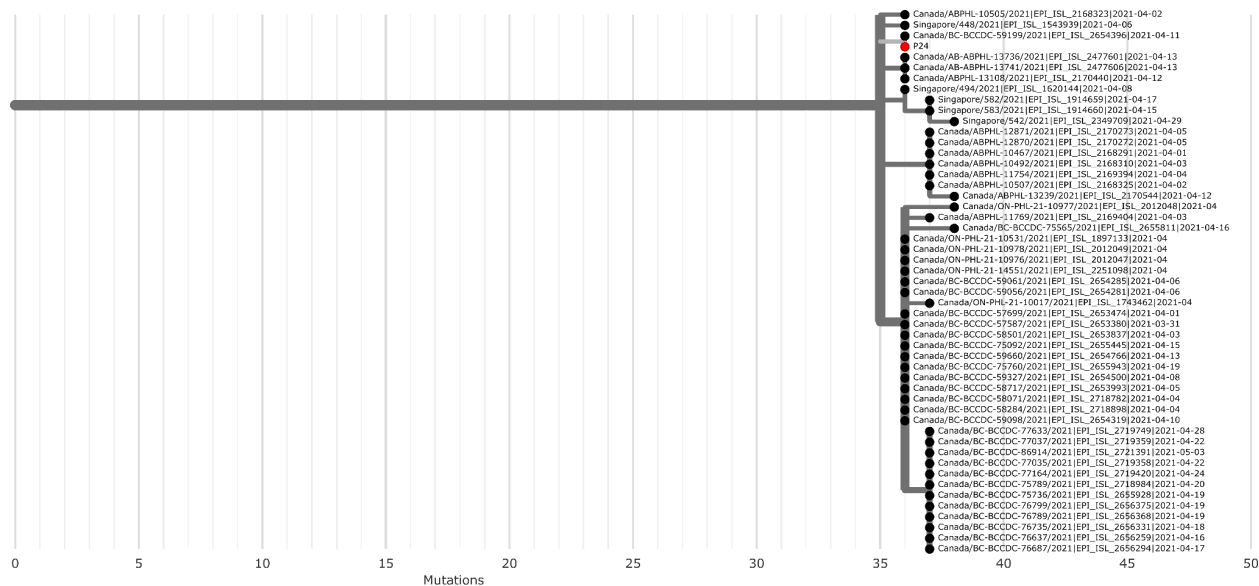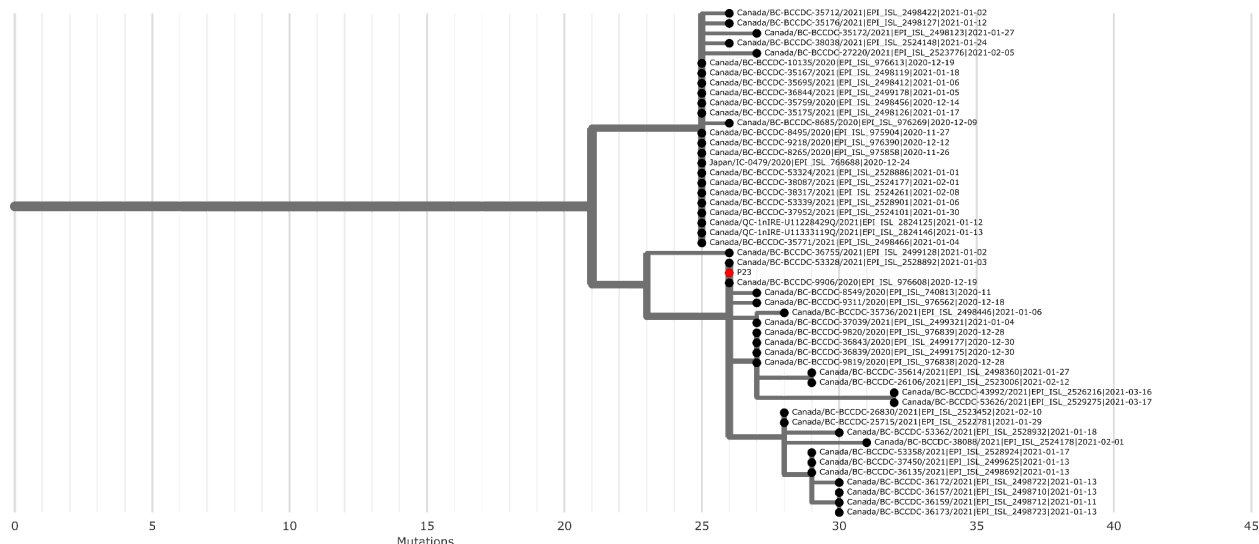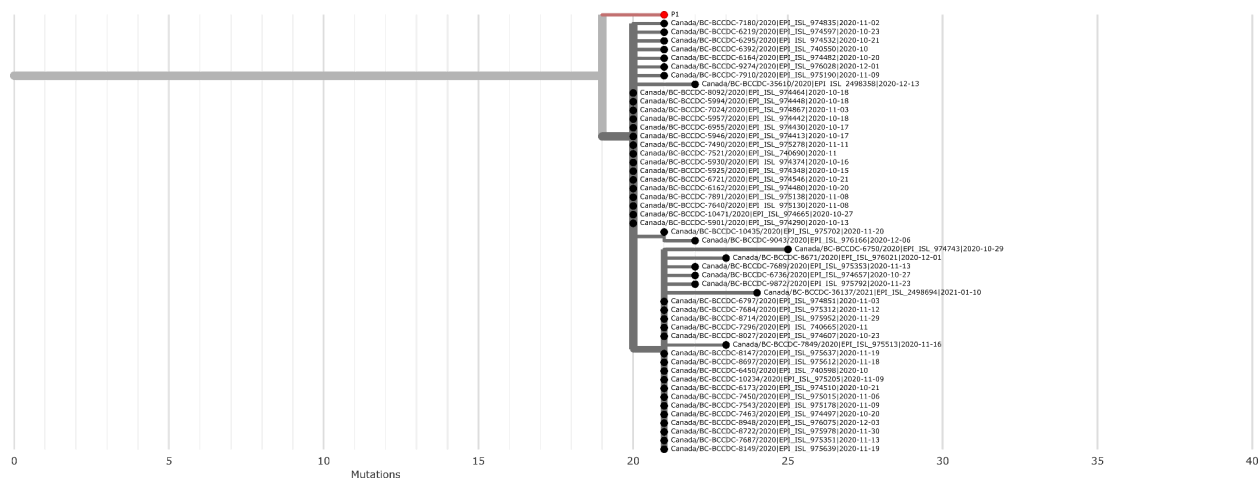



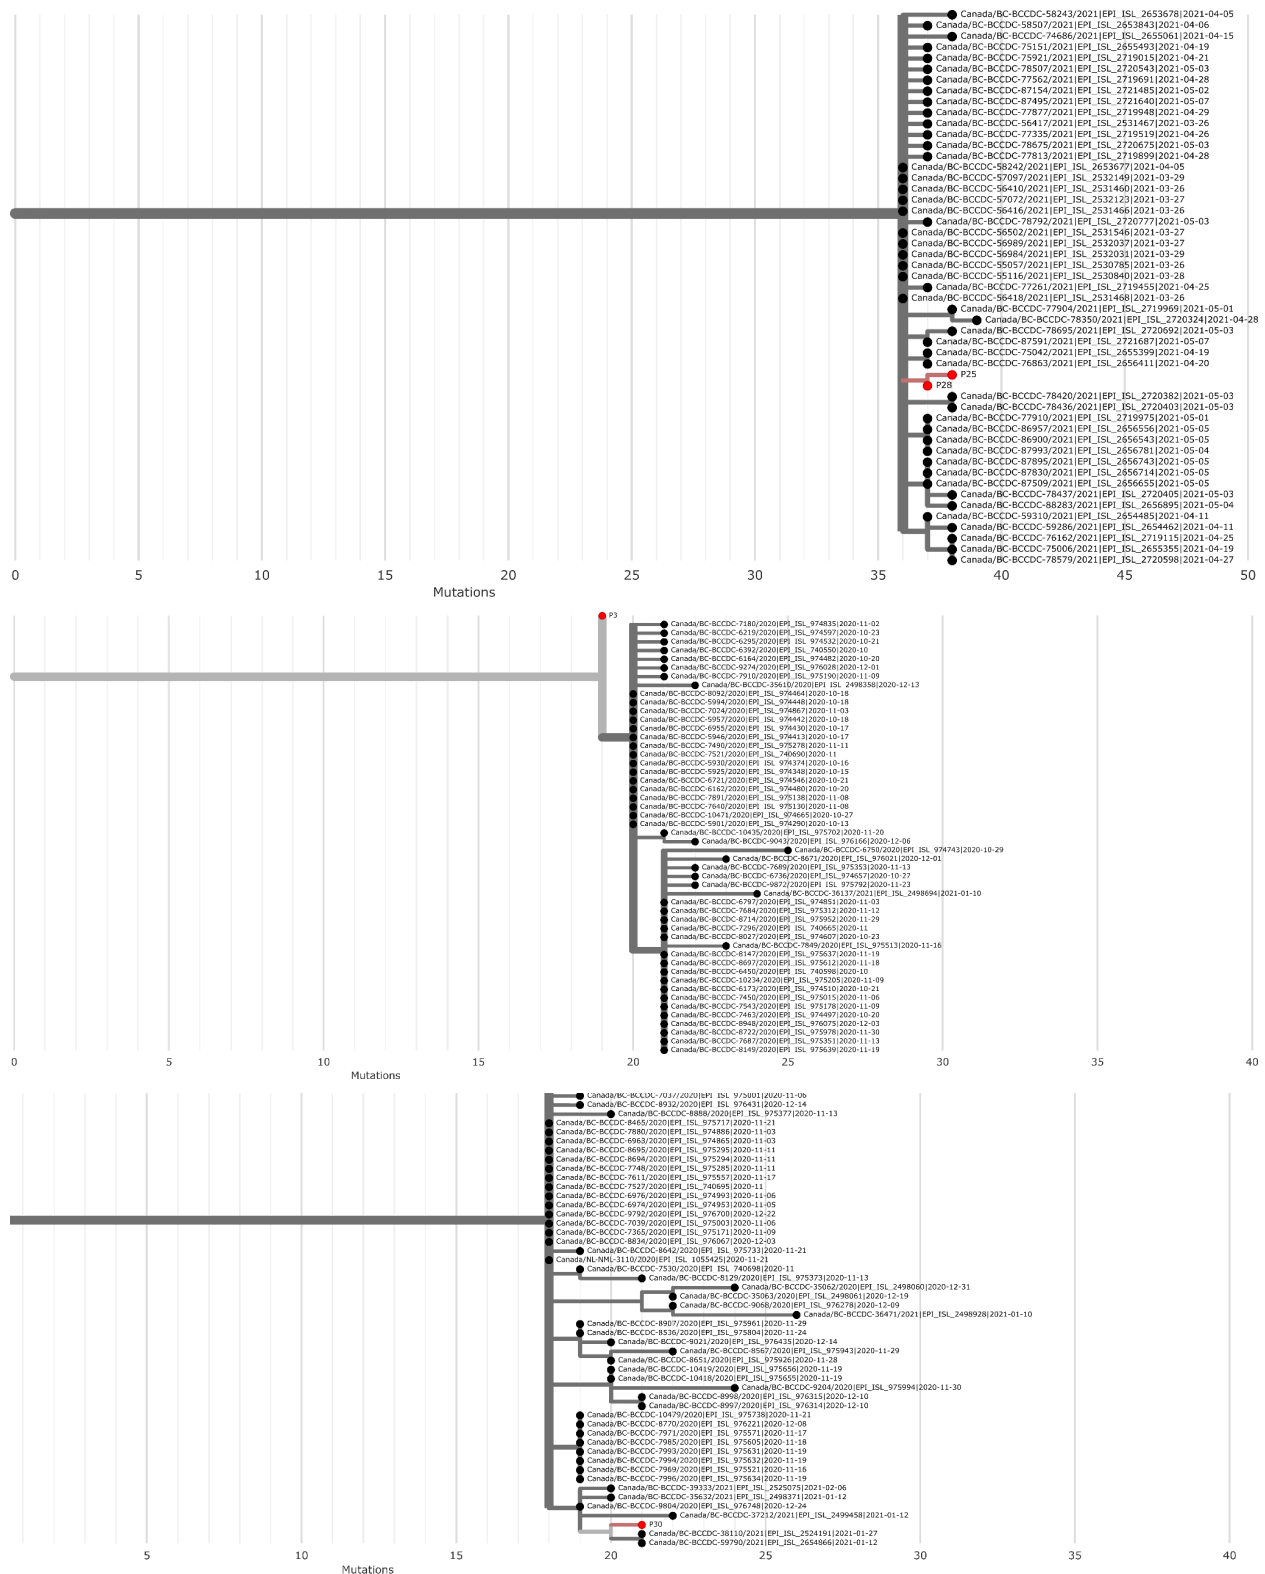

**Supplementary Figure 4:** Phylogenetic Subtrees of Study Samples Compared with 2,447,008 publicly available SARS-CoV-2 genomes. Study samples are marked in red, publicly available genomes are black.

**Supplementary Data:** Representative visualization file for BugSeq metagenomic classification results produced by Recentrifuge
